# Supplementary material for: Phytochemical, biological, DFT, and molecular docking evaluation of Euphorbia paralias
Source: Springer Nature journal article supplement (doi:10.1038/s41598-025-02420-1), 2025-05-23
Supplement: MOESM1 [file 41598_2025_2420_MOESM1_ESM.pdf]

# Supplementary materials

Chemical Constituents and Biological Activities of *Euphorbia paralias*: Phytochemical,  
Quantum Chemical, and Molecular Docking Studies

Abdullah I. Kamel<sup>1\*</sup>, Safa A. Badawy<sup>3</sup>, Mamdouh Abdel-Mogib<sup>3</sup>

& Ahmed Ramadan El-Rokh<sup>2</sup>

<sup>1</sup>Chemistry Department, Faculty of Science, New Mansoura University, Mansoura, Egypt.

<sup>2</sup>Plant Protection Research Institute, Agricultural Research Center, Giza-12618, Egypt.

<sup>3</sup>Chemistry Department, Faculty of Science, Mansoura University, Mansoura-35516, Egypt.

## Table of Contents

Figure S1: <sup>1</sup>H NMR (500 MHz) spectrum of  $\beta$ -sitosterol-3-*O*- $\beta$ -D-glucoside (1) in C<sub>5</sub>D<sub>5</sub>N

Figure S1a: Expanded <sup>1</sup>H NMR (500 MHz) spectrum of  $\beta$ -sitosterol-3-*O*- $\beta$ -D-glucoside (1) in C<sub>5</sub>D<sub>5</sub>N

Figure S1b: Expanded <sup>1</sup>H NMR (500 MHz) spectrum of  $\beta$ -sitosterol-3-*O*- $\beta$ -D-glucoside (1) in C<sub>5</sub>D<sub>5</sub>N

Figure S2: <sup>13</sup>C NMR (125 MHz) spectrum of  $\beta$ -sitosterol-3-*O*- $\beta$ -D-glucoside (1) in C<sub>5</sub>D<sub>5</sub>N

Figure S2a: Expanded <sup>13</sup>C NMR (125 MHz) spectrum of  $\beta$ -sitosterol-3-*O*- $\beta$ -D-glucoside (1) in C<sub>5</sub>D<sub>5</sub>N

Figure S2b: Expanded <sup>13</sup>C NMR (125 MHz) spectrum of  $\beta$ -sitosterol-3-*O*- $\beta$ -D-glucoside (1) in C<sub>5</sub>D<sub>5</sub>N

Figure S3: <sup>1</sup>H NMR (500 MHz) spectrum of genistein-4'- $\beta$ -*O*-D-glucopyranoside (2) and quercetin-3- $\beta$ -*O*-D-glucoside (3) in CD<sub>3</sub>OD

Figure S3a: Expanded <sup>1</sup>H NMR (500 MHz) spectrum of genistein-4'- $\beta$ -*O*-D-glucopyranoside (2) and quercetin-3- $\beta$ -*O*-D-glucoside (3) in CD<sub>3</sub>OD

Figure S4: <sup>1</sup>H NMR (500 MHz) spectrum of kaempferol-3-*O*- $\alpha$ -D-arabinopyranoside (4) in DMSO-*d*<sub>6</sub>

Figure S4a: Expanded <sup>1</sup>H NMR (500 MHz) spectrum of kaempferol-3-*O*- $\alpha$ -D-arabinopyranoside (4) in DMSO-*d*<sub>6</sub>

Figure S5: <sup>1</sup>H NMR (500 MHz) spectrum of quercetin-3-*O*- $\alpha$ -D-arabinopyranoside (5) in DMSO-*d*<sub>6</sub>

Figure S5a: Expanded <sup>1</sup>H NMR (500 MHz) spectrum of quercetin-3-*O*- $\alpha$ -D-arabinopyranoside (5) in DMSO-*d*<sub>6</sub>

Figure S6: <sup>1</sup>H NMR (400 MHz) spectrum of genistein-8 $\beta$ -*C*-glucoside (6) in DMSO-*d*<sub>6</sub>

Figure S6a: Expanded <sup>1</sup>H NMR (400 MHz) spectrum of genistein-8 $\beta$ -*C*-glucoside (6) in DMSO-*d*<sub>6</sub>

Figure S7: APT <sup>13</sup>C NMR (100 MHz) spectrum of genistein-8 $\beta$ -*C*-glucoside (6) in DMSO-*d*<sub>6</sub>

Figure S8: Edited HSQC spectrum of genistein-8 $\beta$ -*C*-glucoside (6) in DMSO-*d*<sub>6</sub>

Figure S9: <sup>1</sup>H NMR (500 MHz) spectrum of hirsutissimide B (7) in CD<sub>3</sub>OD

Figure S9a: Expanded <sup>1</sup>H NMR (500 MHz) spectrum of hirsutissimide B (7) in CD<sub>3</sub>OD

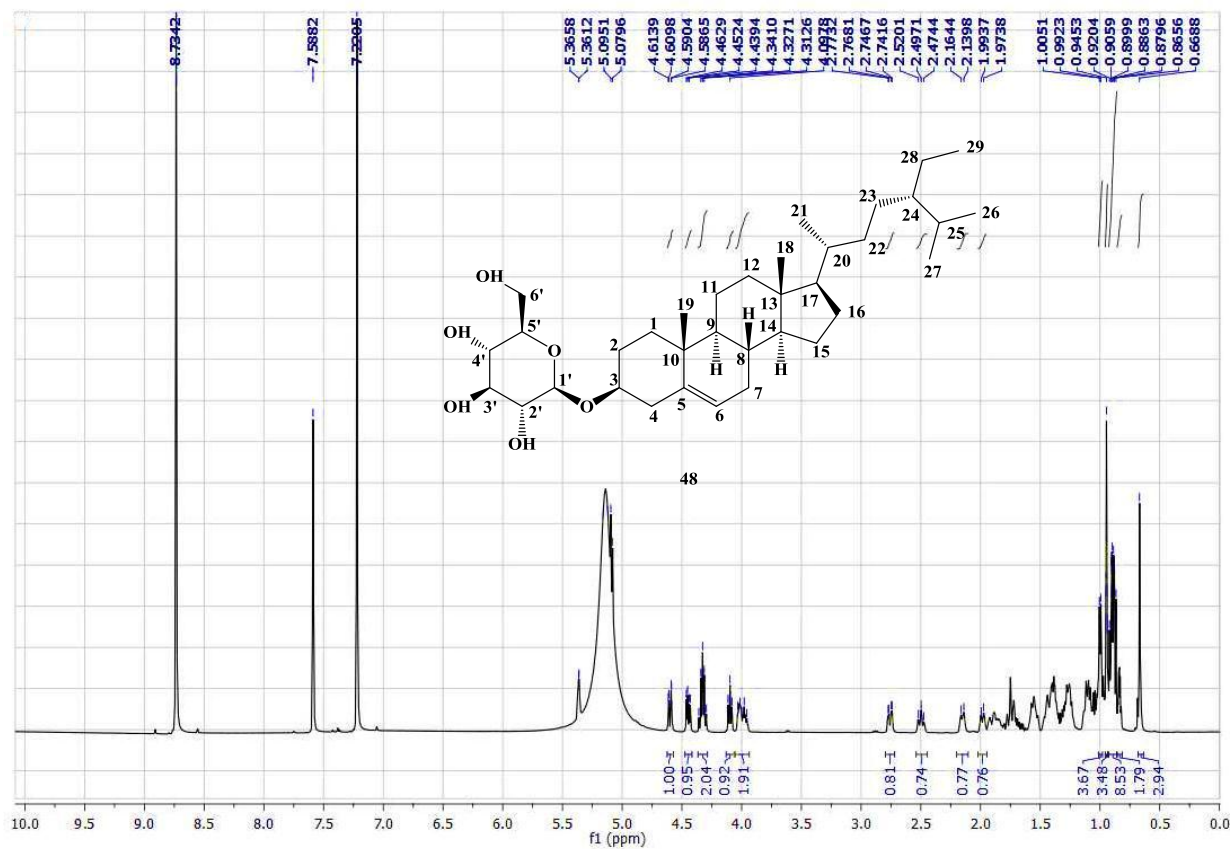

Figure S1:  $^1\text{H}$  NMR (500 MHz) spectrum of  $\beta$ -sitosterol-3-O- $\beta$ -D-glucoside (1) in  $\text{C}_5\text{D}_5\text{N}$

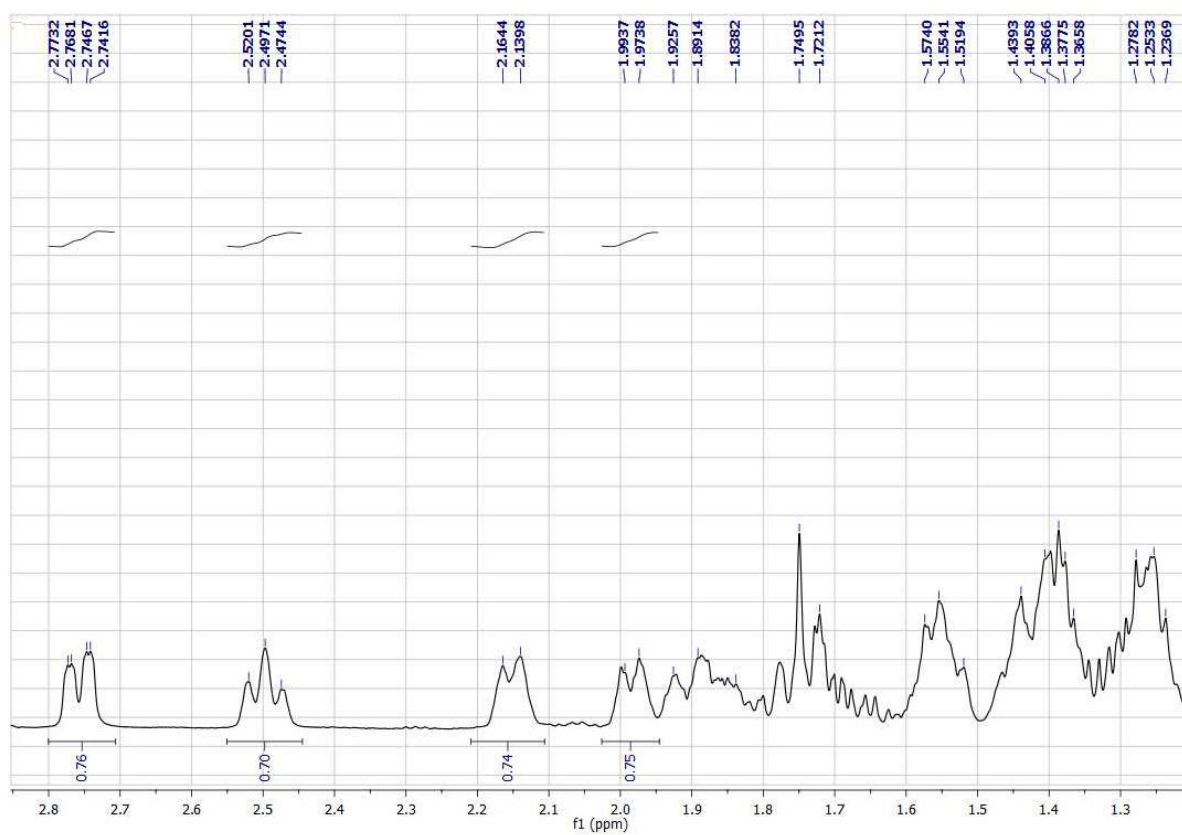

Figure S1a: Expanded  $^1\text{H}$  NMR (500 MHz) spectrum of  $\beta$ -sitosterol-3-O- $\beta$ -D-glucoside (1) in  $\text{C}_5\text{D}_5\text{N}$

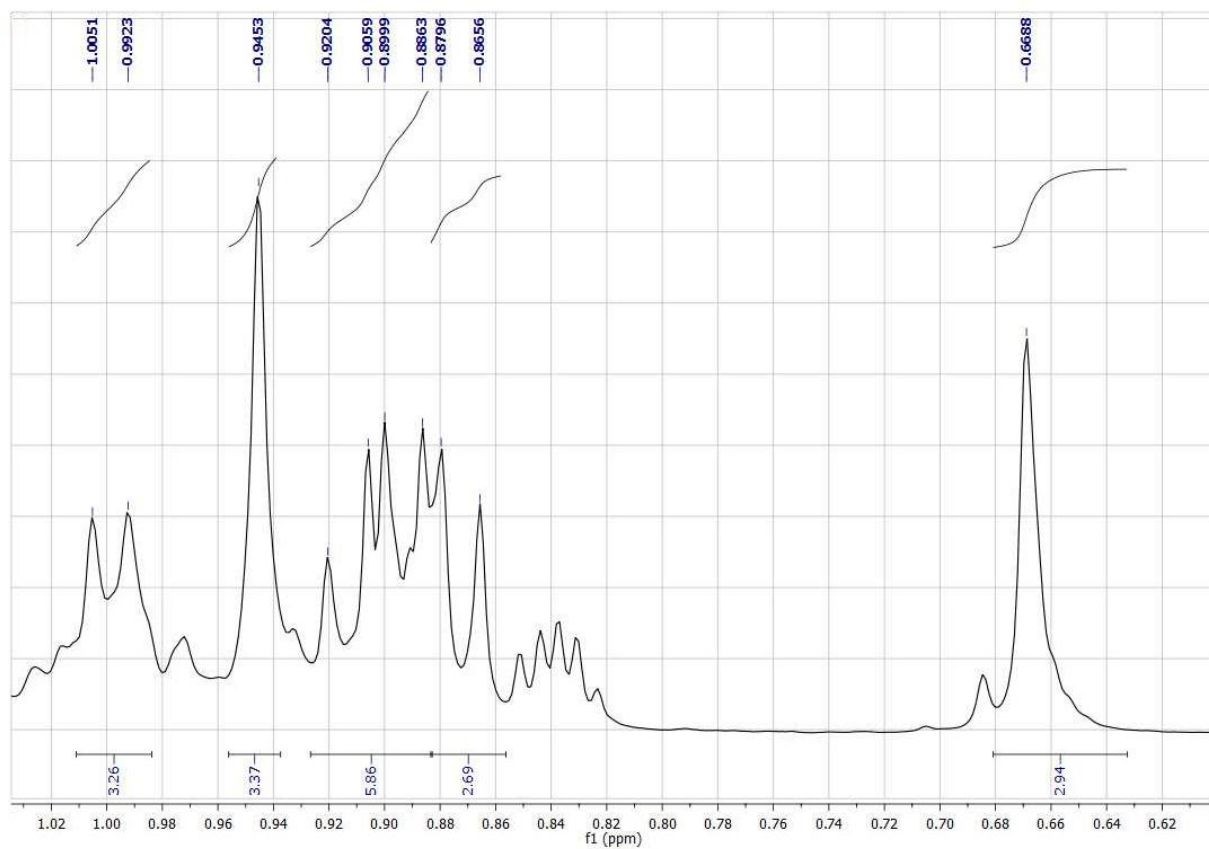

**Figure S1b:** Expanded  $^1\text{H}$  NMR (500 MHz) spectrum of  $\beta$ -sitosterol-3-*O*- $\beta$ -D-glucoside (**1**) in  $\text{C}_5\text{D}_5\text{N}$

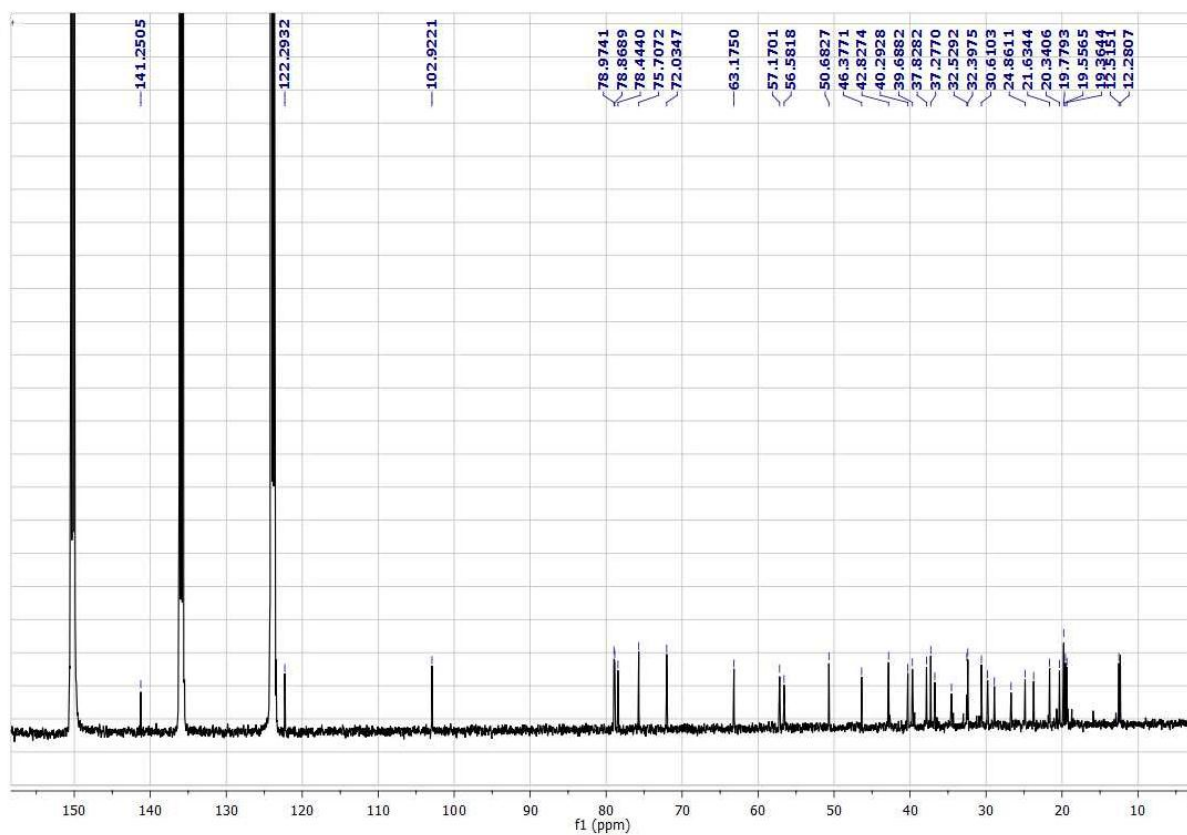

**Figure S2:**  $^{13}\text{C}$  NMR (125 MHz) spectrum of  $\beta$ -sitosterol-3-*O*- $\beta$ -D-glucoside (**1**) in  $\text{C}_5\text{D}_5\text{N}$

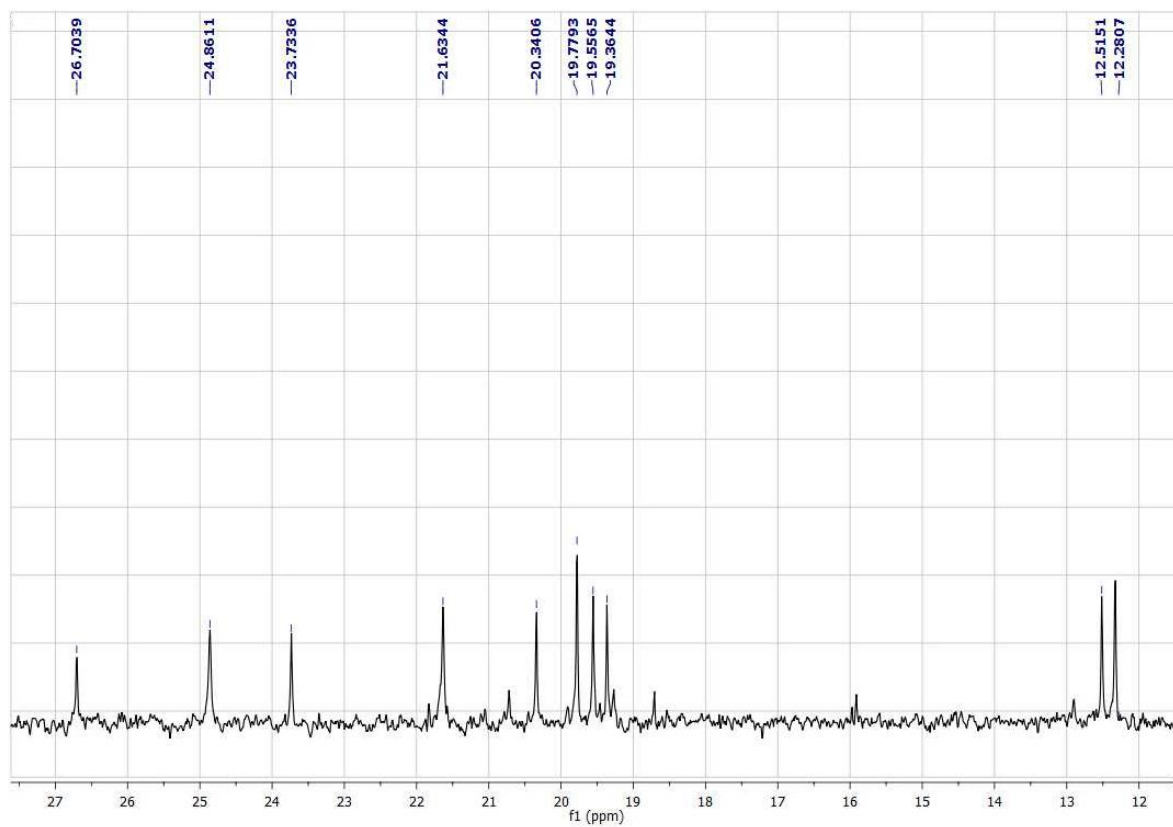

**Figure S2a: Expanded  $^{13}\text{C}$  NMR (125 MHz) spectrum of  $\beta$ -sitosterol-3-*O*- $\beta$ -D-glucoside (1) in  $\text{C}_5\text{D}_5\text{N}$**

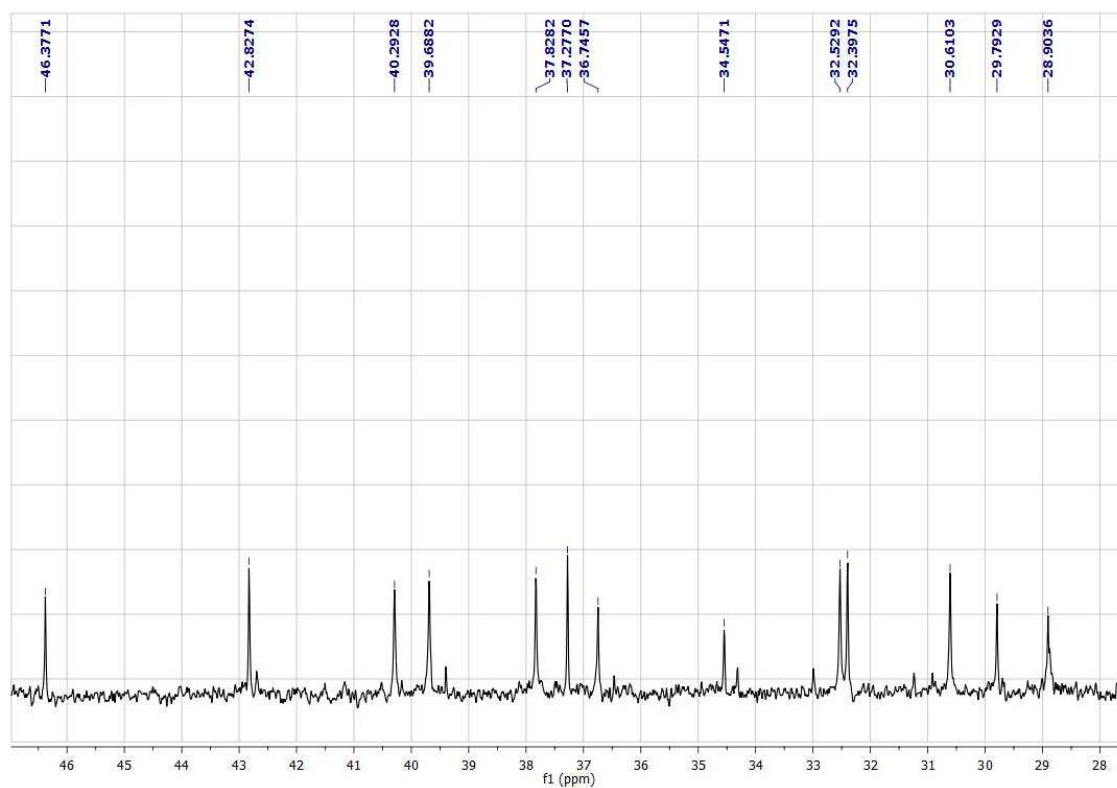

**Figure S2b: Expanded  $^{13}\text{C}$  NMR (125 MHz) spectrum of  $\beta$ -sitosterol-3-*O*- $\beta$ -D-glucoside (1) in  $\text{C}_5\text{D}_5\text{N}$**

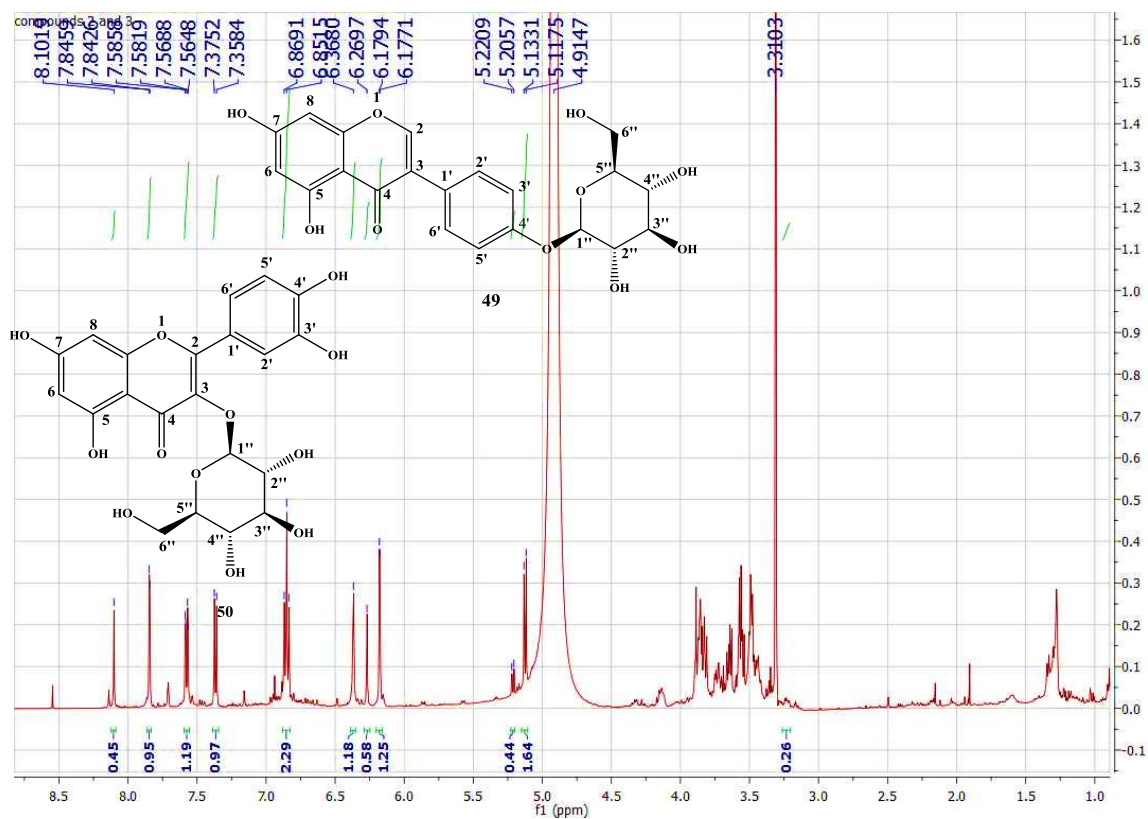

Figure S3:  $^1\text{H}$  NMR (500 MHz) spectrum of genistein-4'- $\beta$ -O-D-glucopyranoside (2) and quercetin-3- $\beta$ -O-D-glucoside (3) in  $\text{CD}_3\text{OD}$

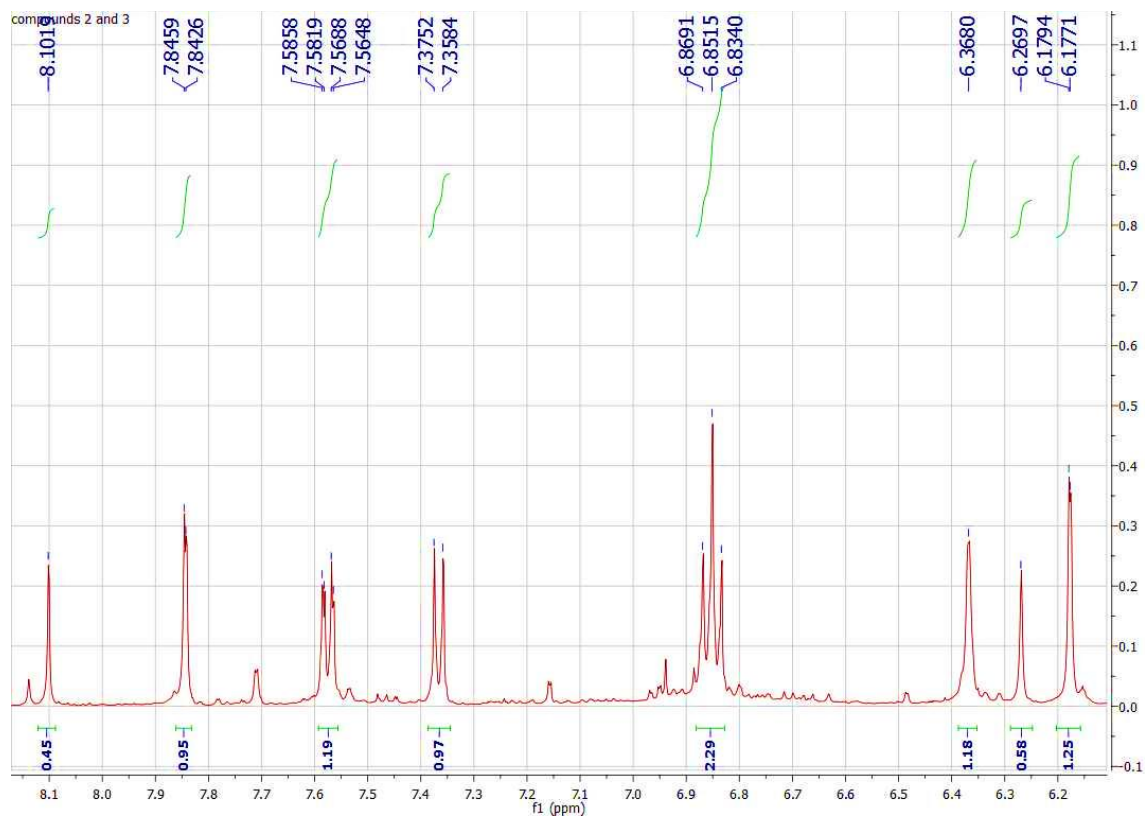

Figure S3a: Expanded  $^1\text{H}$  NMR (500 MHz) spectrum of genistein-4'- $\beta$ -O-D-glucopyranoside (2) and quercetin-3- $\beta$ -O-D-glucoside (3) in  $\text{CD}_3\text{OD}$

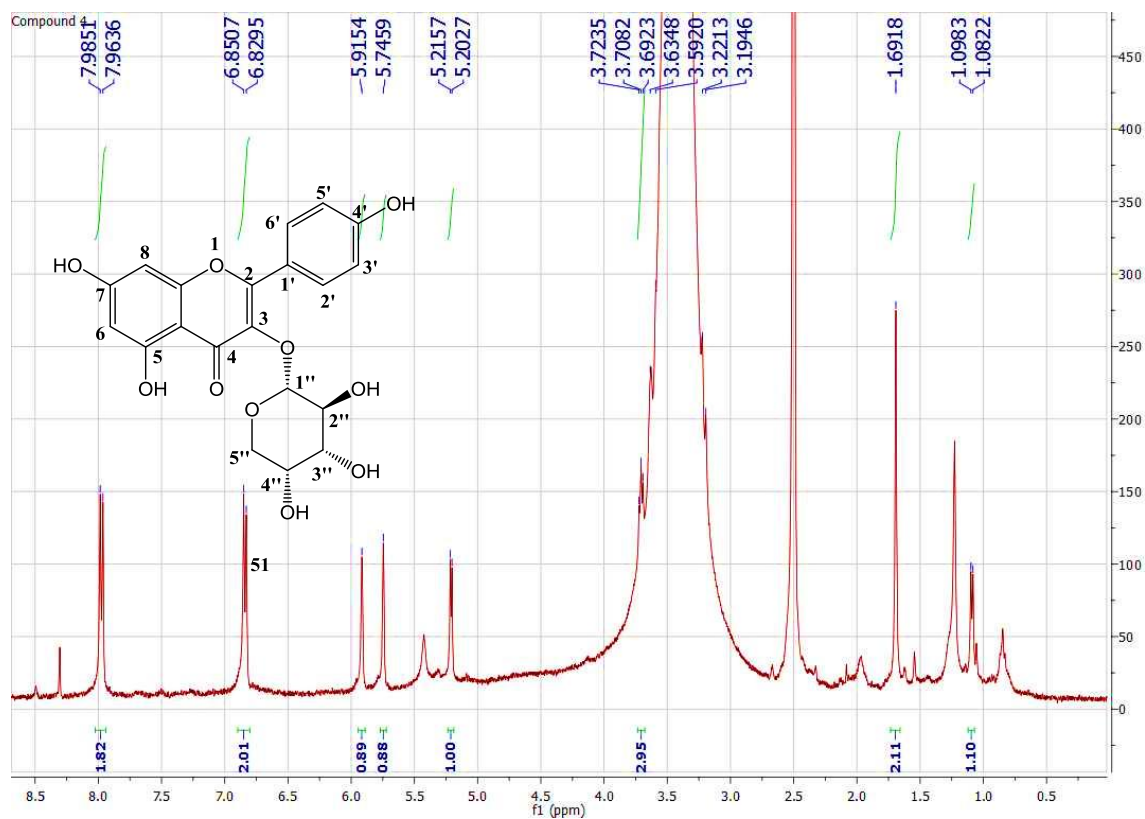

**Figure S4:**  $^1\text{H}$  NMR (500 MHz) spectrum of kaempferol-3-O- $\alpha$ -D-arabinopyranoside (4) in DMSO- $d_6$

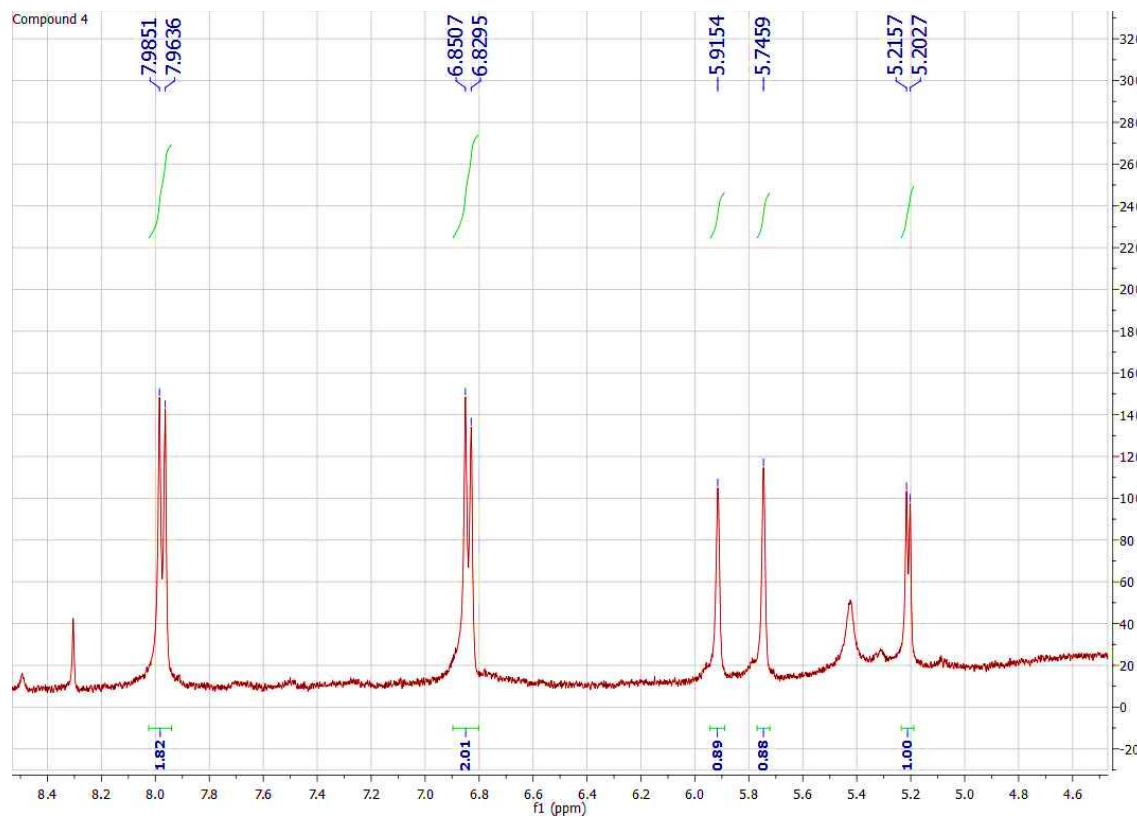

**Figure S4a:** Expanded  $^1\text{H}$  NMR (500 MHz) spectrum of kaempferol-3-O- $\alpha$ -D-arabinopyranoside (4) in DMSO- $d_6$



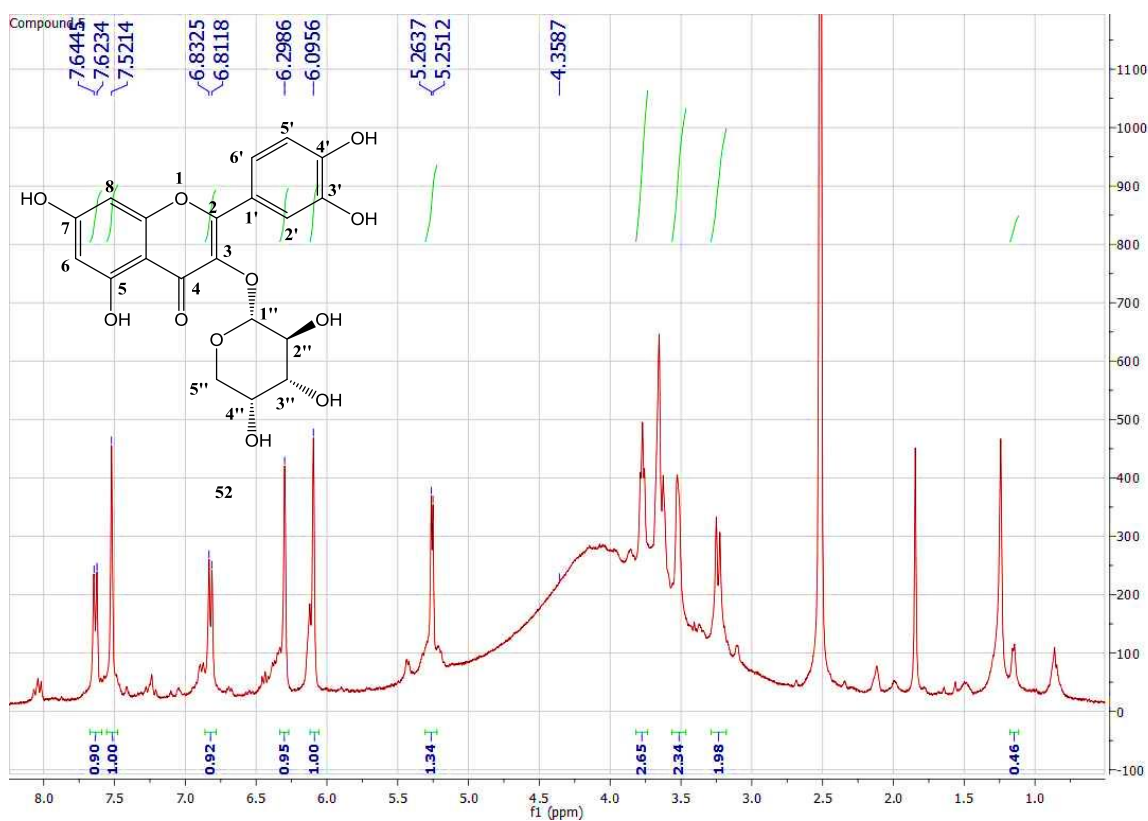

**Figure S5:**  $^1\text{H}$  NMR (500 MHz) spectrum of quercetin-3-O- $\alpha$ -D-arabinopyranoside (5) in DMSO- $d_6$

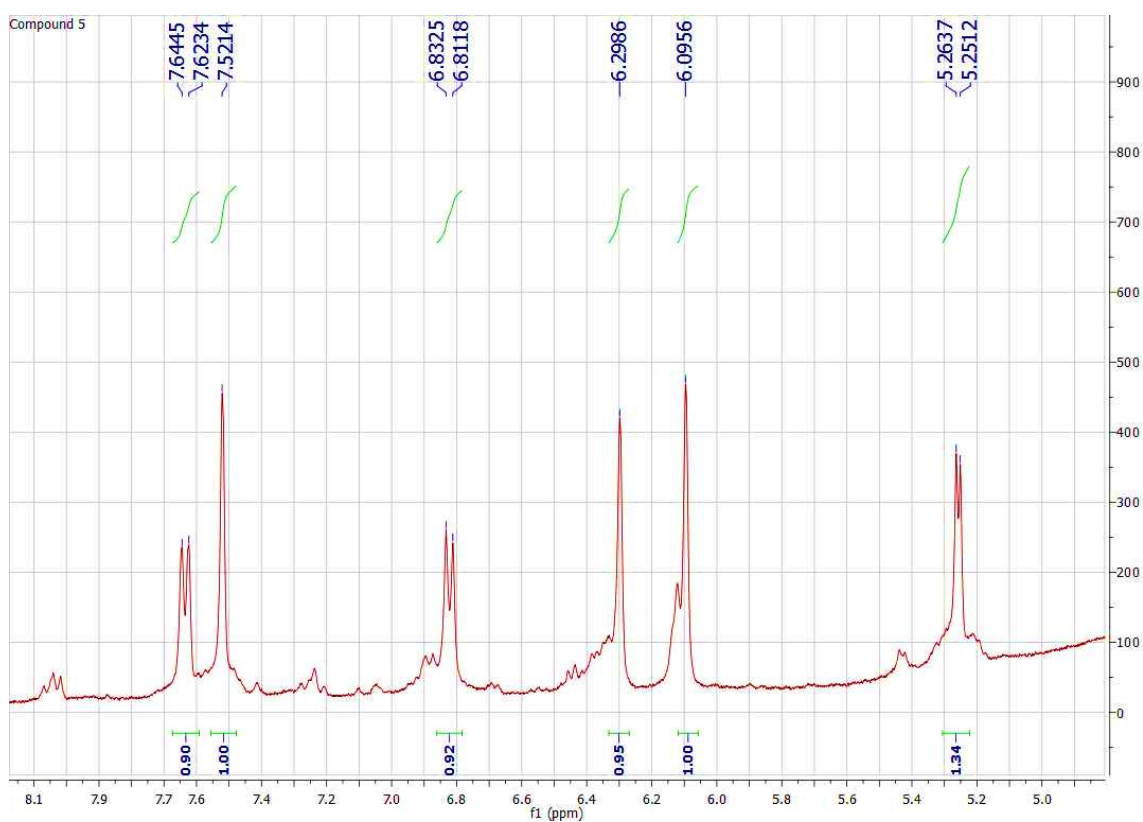

**Figure S5a:** Expanded  $^1\text{H}$  NMR (500 MHz) spectrum of quercetin-3-O- $\alpha$ -D-arabinopyranoside (5) in DMSO- $d_6$

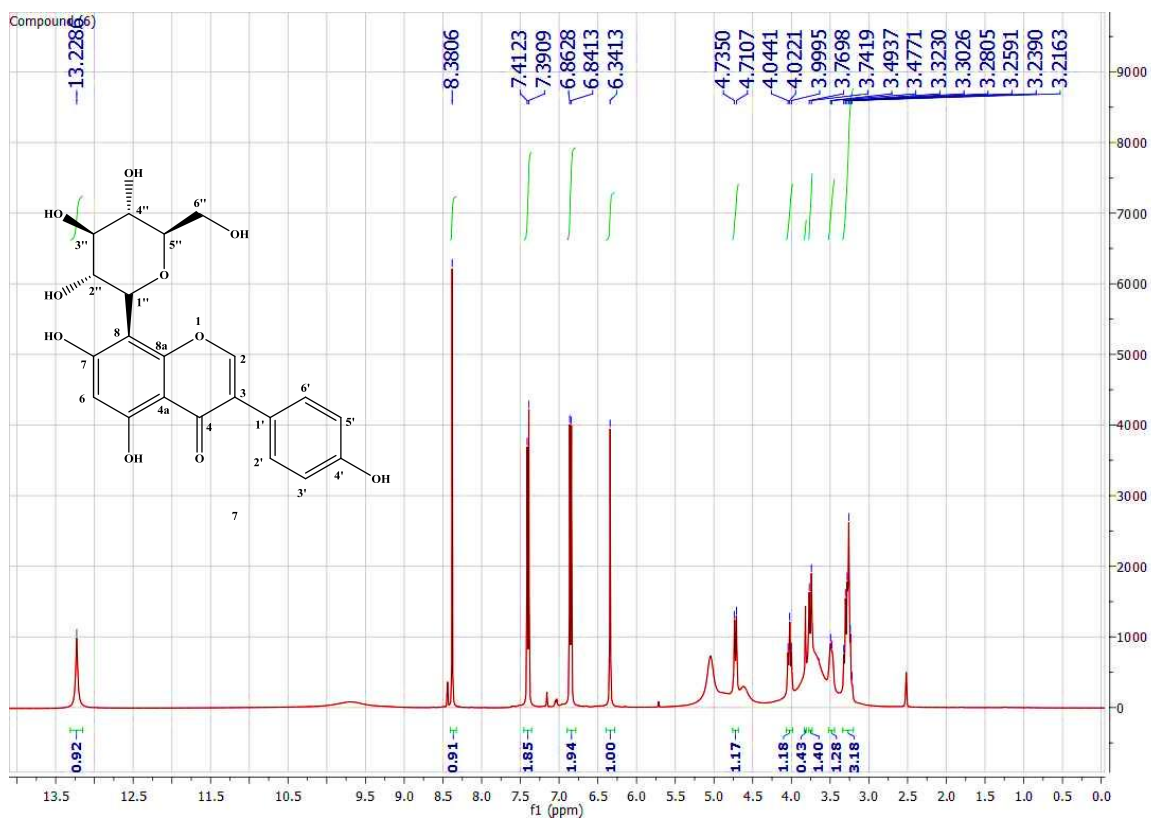

Figure S6: <sup>1</sup>H NMR (400 MHz) spectrum of genistein-8 $\beta$ -C-glucoside (6) in DMSO-*d*<sub>6</sub>

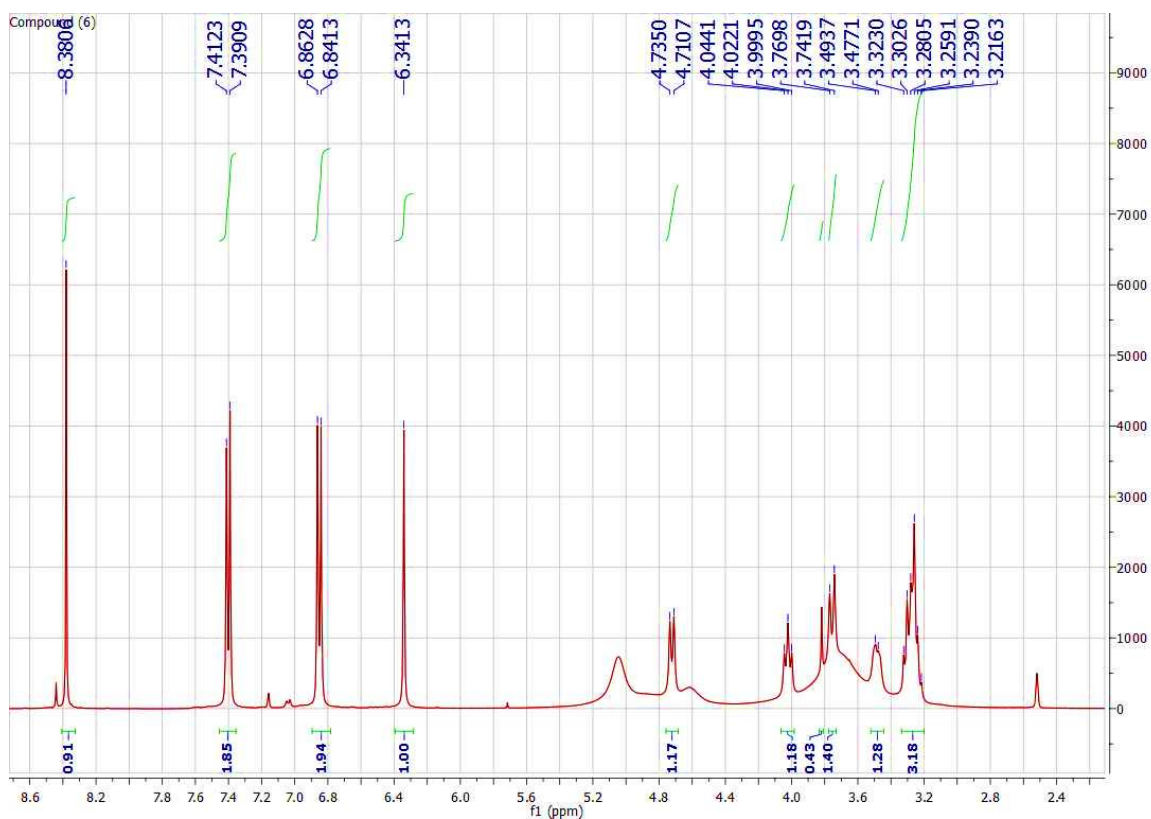

Figure S6a: Expanded <sup>1</sup>H NMR (400 MHz) spectrum of genistein-8 $\beta$ -C-glucoside (6) in DMSO-*d*<sub>6</sub>



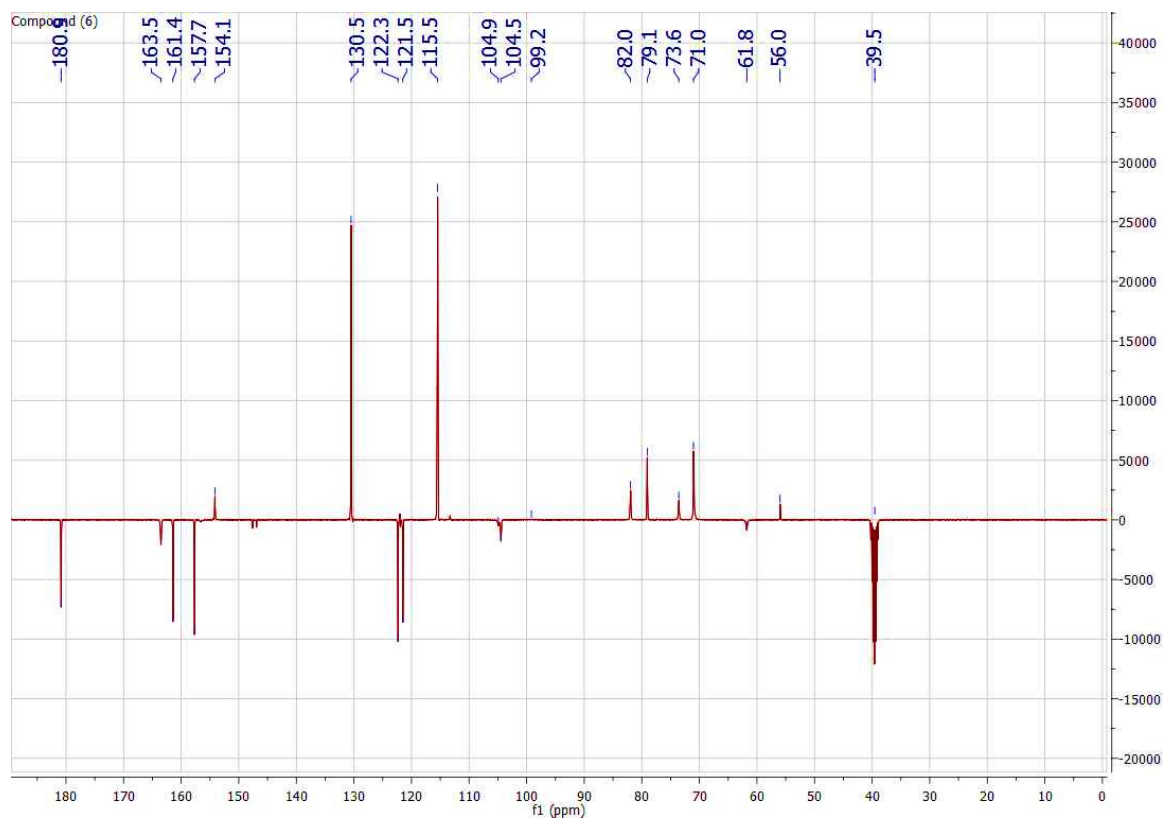

**Figure S7:** APT  $^{13}\text{C}$  NMR (100 MHz) spectrum of genistein-8 $\beta$ -C-glucoside (6) in DMSO- $d_6$

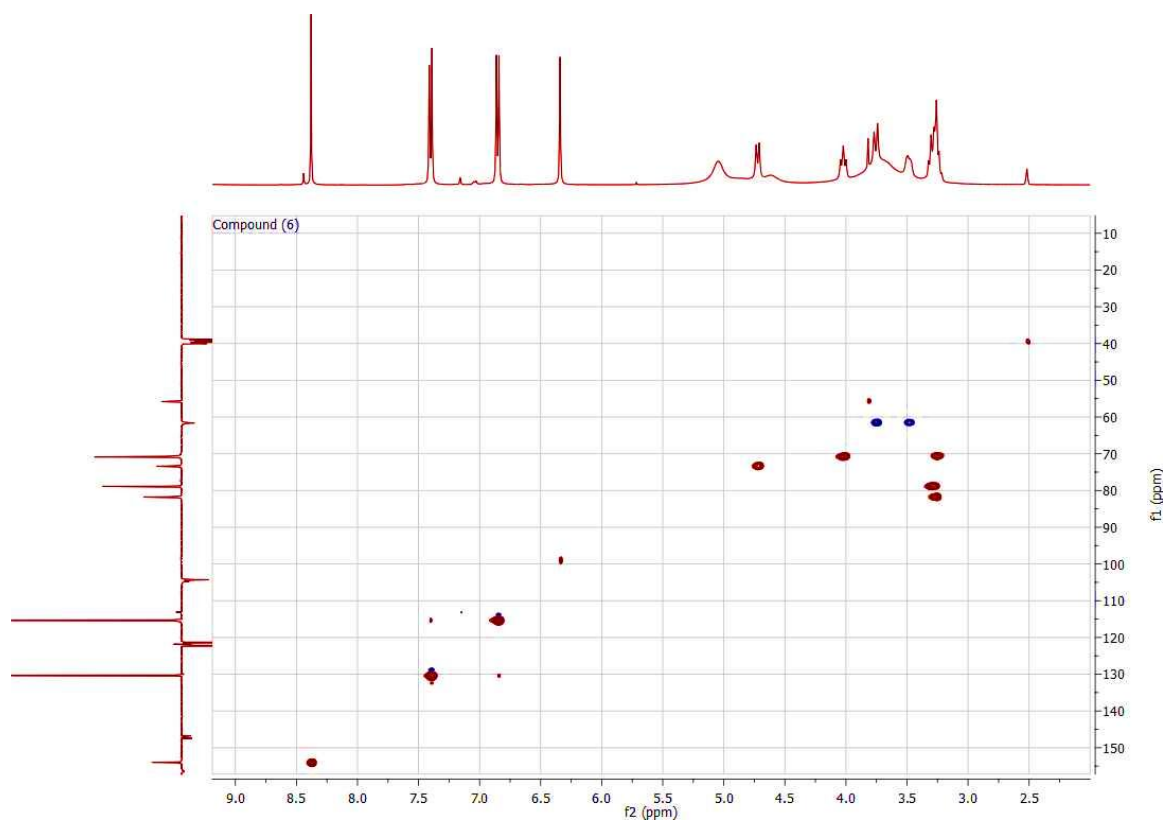

**Figure S8:** Edited HSQC spectrum of genistein-8 $\beta$ -C-glucoside (6) in DMSO- $d_6$  in DMSO- $d_6$

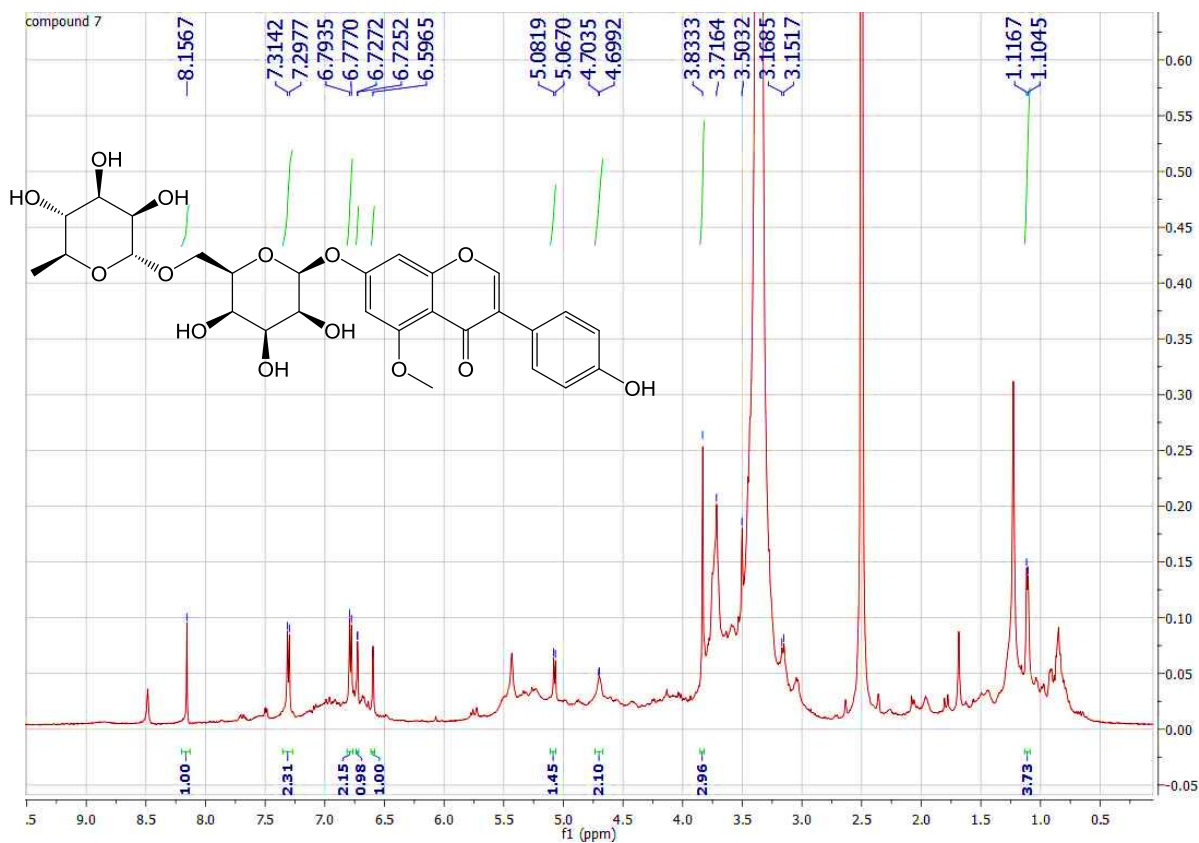

Figure S9:  $^1\text{H}$  NMR (500 MHz) spectrum of hirsutissimide B (7) in  $\text{CD}_3\text{OD}$

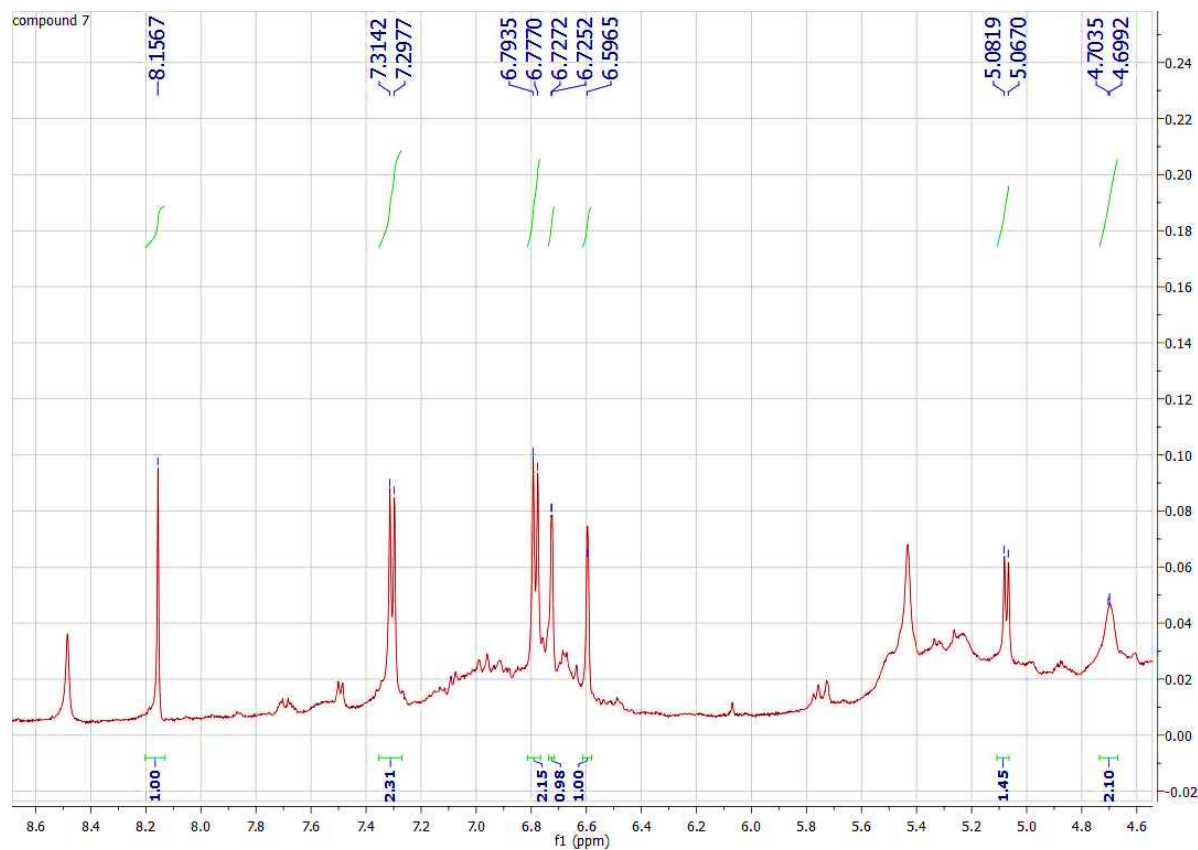

Figure S9a: Expanded  $^1\text{H}$  NMR (500 MHz) spectrum of hirsutissimide B (7) in  $\text{CD}_3\text{OD}$
